# Supplementary material for: Anti-Candida albicans Activity of Ononin and Other Secondary Metabolites from Platonia Insignis MART
Source: MDPI journal article supplement (doi:10.3390/metabo12111014), 2022-10-24
Supplement: s1 [file s1]

## Supplementar material

The structure of ononin is shown in Figure S1 and the physicochemical properties of ononin and fluconazole are shown in Table S1.

**Figure S1.** Structure of ononin.

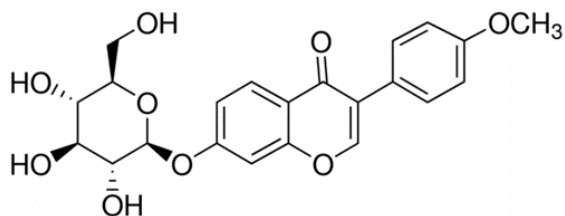

**Table S1.** The Physicochemical Properties of Ononin and Fluconazole:

| Properties                                       | Ononin                                         | Fluconazole                                                     |
|--------------------------------------------------|------------------------------------------------|-----------------------------------------------------------------|
| Formula                                          | C <sub>22</sub> H <sub>22</sub> O <sub>9</sub> | C <sub>13</sub> H <sub>12</sub> F <sub>2</sub> N <sub>6</sub> O |
| Molecular weight (g/mol)                         | 430.40                                         | 306.27                                                          |
| Nº heavy atoms:                                  | 31                                             | 22                                                              |
| Nº aromatic heavy atoms                          | 16                                             | 16                                                              |
| Fraction Csp <sup>3</sup> :                      | 0.32                                           | 0.23                                                            |
| Nº rotatable bonds                               | 5                                              | 5                                                               |
| Nº H-bond acceptors                              | 9                                              | 7                                                               |
| Nº H-bond donors                                 | 4                                              | 1                                                               |
| Molar Refractivity                               | 108.56                                         | 70.71                                                           |
| Topological Polar Surface área (Å <sup>2</sup> ) | 138.82                                         | 81.65                                                           |
